# Supplementary material
Source: PubMed Central journal article supplement (PMC6002241)
Supplement: IMM-154-418-s005.pdf [file IMM-154-418-s005.pdf]

**Table S1: Genes expressed at significantly different levels in Tim-3+ Th1 cells relative to Tim-3- Th1 cells**

| Column # | Column ID    | Entrez Gene | Gene Symbol                 | RefSeq Transcript ID | Fold-Change (Tim-3+ vs. Tim-3-) |             | p-value(Tim-3+ vs. Tim-3-) |
|----------|--------------|-------------|-----------------------------|----------------------|---------------------------------|-------------|----------------------------|
|          |              |             |                             |                      | 3+ vs. Tim-3-                   | vs. Tim-3-  |                            |
| 35886    | 1451584_at   | 171285      | Havcr2                      | NM_134250            | 21.2352                         | 1.11E-05    |                            |
| 34632    | 1450330_at   | 16153       | Il10                        | NM_010548            | 13.6298                         | 5.10E-05    |                            |
| 33205    | 1448898_at   | 20308       | Ccl9                        | NM_011338            | 8.28827                         | 0.00187522  |                            |
| 2274     | 1417936_at   | 20308       | Ccl9                        | NM_011338            | 8.01455                         | 0.000248223 |                            |
| 3947     | 1419609_at   | 12768       | Ccr1                        | NM_009912            | 5.59444                         | 0.000128399 |                            |
| 7125     | 1422812_at   | 80901       | Cxcr6                       | NM_030712            | 5.53537                         | 0.00846438  |                            |
| 11742    | 1427429_at   | 12981       | Csf2                        | NM_009969            | 5.49045                         | 4.23E-05    |                            |
| 29993    | 1445680_x_at | 14064       | F2rl2                       | NM_010170            | 5.37455                         | 0.00046863  |                            |
| 6001     | 1421688_a_at | 20290       | Ccl1                        | NM_011329            | 5.23379                         | 0.00672116  |                            |
| 36164    | 1451862_a_at | 18646       | Prf1                        | NM_011073            | 4.95835                         | 0.00672894  |                            |
| 37454    | 1453152_at   | 71738       | Mamdc2                      | NM_174857            | 4.89277                         | 0.00578768  |                            |
| 6981     | 1422668_at   | 20706       | Serpib9b                    | NM_011452            | 4.77036                         | 0.00330389  |                            |
| 10145    | 1425832_a_at | 80901       | Cxcr6                       | NM_030712            | 4.72587                         | 0.0220019   |                            |
| 3948     | 1419610_at   | 12768       | Ccr1                        | NM_009912            | 4.06186                         | 0.000785257 |                            |
| 4738     | 1420425_at   | 12142       | Prdm1                       | NM_007548            | 3.93508                         | 0.000277021 |                            |
| 7639     | 1423326_at   | 12495       | Entpd1                      | NM_009848            | 3.91277                         | 0.0026754   |                            |
| 37096    | 1452794_x_at | 545728      | /// 54 4933402N22Rik //1586 | /// XR_002345        | 3.8466                          | 0.0167287   |                            |
| 2236     | 1417898_a_at | 14938       | Gzma                        | NM_010370            | 3.66034                         | 0.000471297 |                            |
| 32520    | 1448213_at   | 16952       | Anxa1                       | NM_010730            | 3.59708                         | 0.011088    |                            |
| 5907     | 1421594_a_at | 83671       | Sytl2                       | 1088 /// NM_031394   | 3.55745                         | 0.000115311 |                            |
| 35241    | 1450939_at   | 12495       | Entpd1                      | NM_009848            | 3.53495                         | 0.000318138 |                            |
| 5720     | 1421407_at   | 14064       | F2rl2                       | NM_010170            | 3.45826                         | 0.000254579 |                            |
| 26747    | 1442434_at   | 244418      | D8Ert82e                    | NM_172911            | 3.31444                         | 0.000169934 |                            |
| 41720    | 1457418_at   | ---         | ---                         | ---                  | 3.28844                         | 0.0465949   |                            |
| 9458     | 1425145_at   | 17082       | Il1rl1                      | 1602 /// NM_010743   | 3.24699                         | 0.00257017  |                            |
| 5499     | 1421186_at   | 12772       | Ccr2                        | NM_009915            | 3.20836                         | 0.0160432   |                            |
| 19577    | 1435264_at   | 246707      | Emilin2                     | NM_145158            | 3.20256                         | 0.00080334  |                            |
| 1209     | 1416871_at   | 11501       | Adam8                       | NM_007403            | 3.1987                          | 0.0125946   |                            |
| 18029    | 1433716_x_at | 14586       | Gfra2                       | NM_008115            | 3.19593                         | 0.00124047  |                            |
| 22482    | 1438169_a_at | 232288      | Frmd4b                      | NM_145148            | 3.16938                         | 0.000829423 |                            |
| 37888    | 1453586_at   | 12495       | Entpd1                      | NM_009848            | 3.14928                         | 0.0110672   |                            |
| 5501     | 1421188_at   | 12772       | Ccr2                        | NM_009915            | 2.99177                         | 0.00851716  |                            |
| 8855     | 1424542_at   | 20198       | S100a4                      | NM_011311            | 2.91673                         | 0.0388114   |                            |
| 36794    | 1452492_a_at | 56857       | Slc37a2                     | 1960 /// NM_020258   | 2.86411                         | 9.63E-05    |                            |
| 4003     | 1419665_a_at | 56312       | Nupr1                       | NM_019738            | 2.80762                         | 0.00450815  |                            |

|       |                |           |          |                    |         |             |
|-------|----------------|-----------|----------|--------------------|---------|-------------|
| 28739 | 1444426_at     | 320664    | Cass4    | ;/// NM_001080820  | 2.7871  | 0.00337833  |
| 3061  | 1418723_at     | 65086     | Lpar3    | NM_022983          | 2.77809 | 0.00745199  |
| 20963 | 1436650_at     | 70598     | Filip1   | NM_001081243       | 2.75038 | 0.0350488   |
| 5500  | 1421187_at     | 12772     | Ccr2     | NM_009915          | 2.74493 | 0.00790545  |
| 40895 | 1456593_at --- | ---       | ---      | ---                | 2.71794 | 0.0133848   |
| 12649 | 1428336_at     | 68262     | Agpat4   | NM_026644          | 2.71217 | 0.00442165  |
| 28837 | 1444524_at     | 100043424 | Gm14005  | 8590 /// NR_028591 | 2.68502 | 0.00182187  |
| 3669  | 1419331_at     | 12557     | Cdh17    | NM_019753          | 2.64932 | 0.0405157   |
| 36425 | 1452123_s_at   | 232288    | Frmd4b   | NM_145148          | 2.64676 | 0.00105378  |
| 25527 | 1441214_at     | 320051    | Exph5    | NM_176846          | 2.63605 | 0.00235015  |
| 24103 | 1439790_at     | 20723     | Serpinb9 | NM_009256          | 2.60477 | 0.00223481  |
| 3870  | 1419532_at     | 16178     | Il1r2    | NM_010555          | 2.55638 | 0.0302958   |
| 4714  | 1420401_a_at   | 56089     | Ramp3    | NM_019511          | 2.51288 | 0.00931641  |
| 22334 | 1438021_at     | 245945    | Rbm47    | 065 /// NM_178446  | 2.47867 | 0.00464446  |
| 13837 | 1429524_at     | 17916     | Myo1f    | NM_053214          | 2.46954 | 0.00134056  |
| 6169  | 1421856_at     | 20197     | S100a3   | NM_011310          | 2.46479 | 0.00954623  |
| 24127 | 1439814_at     | 241633    | Atp8b4   | NM_001080944       | 2.43569 | 0.0102201   |
| 13843 | 1429530_a_at   | 77626     | Smpd4    | 611 /// NM_029945  | 2.4011  | 0.000641113 |
| 7544  | 1423231_at     | 64011     | Nrgn     | NM_022029          | 2.38437 | 0.0359655   |
| 10100 | 1425787_a_at   | 83672     | Syt13    | 368 /// NM_183370  | 2.33668 | 0.0130874   |
| 10436 | 1426123_a_at   | 81910     | Rrbp1    | 281 /// NM_133626  | 2.32149 | 1.90E-05    |
| 10376 | 1426063_a_at   | 14579     | Gem      | NM_010276          | 2.30525 | 0.000999067 |
| 33528 | 1449221_a_at   | 81910     | Rrbp1    | 281 /// NM_133626  | 2.28281 | 0.000144443 |
| 39393 | 1455091_at     | 235542    | Ppp2r3a  | .362 /// NM_172144 | 2.26942 | 0.00194238  |
| 23702 | 1439389_s_at   | 50918     | Myadm    | 766 /// NM_016969  | 2.24494 | 0.0228193   |
| 41002 | 1456700_x_at   | 17118     | Marcks   | NM_008538          | 2.2387  | 0.0273432   |
| 34433 | 1450131_a_at   | 192120    | Bspry    | NM_138653          | 2.22315 | 0.00271371  |
| 29461 | 1445148_at --- | ---       | ---      | ---                | 2.209   | 0.0233347   |
| 13844 | 1429531_at     | 77626     | Smpd4    | 611 /// NM_029945  | 2.20205 | 0.000418331 |
| 27125 | 1442812_at     | 433844    | Gm10482  | NM_001034888       | 2.1994  | 0.0447912   |
| 44214 | 1459913_at     | 22035     | Tnfsf10  | NM_009425          | 2.19428 | 0.0235431   |
| 4268  | 1419942_at     | 76650     | Srxn1    | NM_029688          | 2.19252 | 0.0118726   |
| 4004  | 1419666_x_at   | 56312     | Nupr1    | NM_019738          | 2.17918 | 0.00609125  |
| 311   | 1415973_at     | 17118     | Marcks   | NM_008538          | 2.17012 | 0.0324731   |
| 2464  | 1418126_at     | 20304     | Ccl5     | NM_013653          | 2.16826 | 0.0269777   |
| 12390 | 1428077_at     | 72160     | Tmem163  | NM_028135          | 2.16101 | 0.00260396  |
| 17966 | 1433653_at     | 208659    | Fam20a   | NM_153782          | 2.15671 | 0.00132489  |
| 32152 | 1447839_x_at   | 11535     | Adm      | NM_009627          | 2.15    | 0.00460167  |
| 37362 | 1453060_at     | 67792     | Rgs8     | NM_026380          | 2.14015 | 0.00319475  |
| 34868 | 1450566_at     | 16187     | Il3      | NM_010556          | 2.13693 | 0.030109    |

|       |                |        |               |                    |          |             |
|-------|----------------|--------|---------------|--------------------|----------|-------------|
| 40348 | 1456046_at     | 17064  | Cd93          | NM_010740          | 2.12871  | 0.00233287  |
| 24260 | 1439947_at     | 13070  | Cyp11a1       | NM_019779          | 2.12812  | 0.000544571 |
| 10907 | 1426594_at     | 232288 | Frmd4b        | NM_145148          | 2.12009  | 0.00692289  |
| 3522  | 1419184_a_at   | 14200  | Fhl2          | NM_010212          | 2.10506  | 0.000697012 |
| 2740  | 1418402_at     | 11492  | Adam19        | NM_009616          | 2.08281  | 0.00292885  |
| 3927  | 1419589_at     | 17064  | Cd93          | NM_010740          | 2.07937  | 0.000471126 |
| 20953 | 1436640_x_at   | 68262  | Agpat4        | NM_026644          | 2.07745  | 0.00360904  |
| 9288  | 1424975_at     | 233186 | Siglec5       | NM_145581          | 2.06225  | 0.017124    |
| 18870 | 1434557_at     | 215114 | Hip1          | NM_146001          | 2.06084  | 0.000814353 |
| 37898 | 1453596_at     | 15902  | Id2           | NM_010496          | 2.05817  | 0.0322608   |
| 7843  | 1423530_at     | 57740  | Stk32c        | 1540 /// NM_021302 | 2.04495  | 0.0127474   |
| 20268 | 1435955_at     | 243958 | Siglecg       | NM_172900          | 2.02814  | 0.0013192   |
| 13838 | 1429525_s_at   | 17916  | Myo1f         | NM_053214          | 2.02695  | 0.00204243  |
| 10404 | 1426091_a_at   | 22410  | Wnt10b        | NM_011718          | 2.00451  | 0.00129032  |
| 8567  | 1424254_at     | 68713  | Ifitm1        | 1715 /// NM_026820 | 2.00083  | 0.00035649  |
| 43125 | 1458823_at --- | ---    | ---           | ---                | -2.00724 | 0.00370458  |
| 9384  | 1425071_s_at   | 18213  | Ntrk3         | 1746 /// NM_182809 | -2.01346 | 0.00273747  |
| 39466 | 1455164_at     | 12549  | Arhgap31      | NM_020260          | -2.03223 | 0.00156139  |
| 36271 | 1451969_s_at   | 235587 | Parp3         | NM_145619          | -2.0473  | 0.0012918   |
| 10523 | 1426210_x_at   | 235587 | Parp3         | NM_145619          | -2.0505  | 0.00107384  |
| 17481 | 1433168_x_at   | 76105  | 5830456J23Rik | ---                | -2.05062 | 0.0274665   |
| 17768 | 1433455_at     | 16923  | Sh2b3         | NM_008507          | -2.05904 | 0.00293643  |
| 18328 | 1434015_at     | 227659 | Slc2a6        | 1627 /// NM_172659 | -2.06947 | 0.0205292   |
| 6944  | 1422631_at     | 11622  | Ahr           | NM_013464          | -2.07456 | 0.00255277  |
| 14748 | 1430435_at     | 16764  | Aff3          | NM_010678          | -2.08692 | 0.000757911 |
| 31601 | 1447288_at --- | ---    | ---           | ---                | -2.09588 | 0.00109561  |
| 892   | 1416554_at     | 54132  | Pdlim1        | NM_016861          | -2.14645 | 0.00875848  |
| 36718 | 1452416_at     | 16194  | Il6ra         | NM_010559          | -2.16889 | 0.000484554 |
| 19807 | 1435494_s_at   | 109620 | Dsp           | NM_023842          | -2.17875 | 0.0268967   |
| 9765  | 1425452_s_at   | 105005 | Fam84a        | NM_029007          | -2.19169 | 0.0140049   |
| 18722 | 1434409_at     | 278097 | Armcx6        | NM_001007578       | -2.2067  | 0.032436    |
| 37870 | 1453568_at     | 76747  | Dapl1         | NM_029723          | -2.2076  | 0.0477207   |
| 11389 | 1427076_at     | 17476  | Mpeg1         | NM_010821          | -2.21576 | 0.00778952  |
| 24294 | 1439981_at     | 67596  | 5830405N20Rik | NM_183264          | -2.22222 | 0.00480506  |
| 28364 | 1444051_at     | 67080  | 1700019D03Rik | NM_144953          | -2.22463 | 0.00191622  |
| 20889 | 1436576_at     | 215900 | Fam26f        | NM_175449          | -2.23042 | 0.0201386   |
| 29977 | 1445664_at --- | ---    | ---           | ---                | -2.23363 | 0.00260686  |
| 9127  | 1424814_a_at   | 66813  | Bcl2l14       | NM_025778          | -2.25358 | 0.00742043  |
| 13280 | 1428967_at     | 16001  | Igf1r         | NM_010513          | -2.26864 | 0.0022584   |
| 12645 | 1428332_at     | 216505 | Pik3ip1       | NM_178149          | -2.28172 | 0.0362375   |

|       |                |        |               |                    |          |             |
|-------|----------------|--------|---------------|--------------------|----------|-------------|
| 3902  | 1419564_at     | 68910  | Zfp467        | 417 /// NM_020589  | -2.28636 | 0.0364783   |
| 18138 | 1433825_at     | 18213  | Ntrk3         | 3746 /// NM_182809 | -2.29266 | 0.0108227   |
| 9797  | 1425484_at     | 252838 | Tox           | NM_145711          | -2.30076 | 0.046505    |
| 34227 | 1449925_at     | 12766  | Cxcr3         | NM_009910          | -2.30791 | 0.00616883  |
| 43276 | 1458974_at --- | ---    | ---           | ---                | -2.32392 | 0.0386075   |
| 13272 | 1428959_at     | 67596  | 5830405N20Rik | NM_183264          | -2.33718 | 7.65E-05    |
| 6479  | 1422166_at     | 93675  | Clec2i        | NM_020257          | -2.33826 | 0.0115364   |
| 6304  | 1421991_a_at   | 16010  | Igfbp4        | NM_010517          | -2.34172 | 0.00598552  |
| 5241  | 1420928_at     | 20440  | St6gal1       | NM_145933          | -2.34554 | 0.00925705  |
| 17482 | 1433169_at     | 76105  | 5830456J23Rik | ---                | -2.36779 | 0.00494082  |
| 1256  | 1416918_at     | 53310  | Dlg3          | 1780 /// NM_016747 | -2.37362 | 0.000854952 |
| 21532 | 1437219_at --- | ---    | ---           | ---                | -2.37369 | 0.0210219   |
| 3322  | 1418984_at     | 12695  | Inadl         | 1704 /// NM_172696 | -2.38034 | 0.00092165  |
| 14681 | 1430368_s_at   | 67080  | 1700019D03Rik | NM_144953          | -2.40103 | 0.00655204  |
| 6751  | 1422438_at     | 13849  | Ephx1         | NM_010145          | -2.41459 | 0.00376042  |
| 31598 | 1447285_at --- | ---    | ---           | ---                | -2.41544 | 0.00721838  |
| 37284 | 1452982_at     | 16001  | Igf1r         | NM_010513          | -2.42659 | 0.00377411  |
| 1938  | 1417600_at     | 57738  | Slc15a2       | 1899 /// NM_021301 | -2.46243 | 0.00251656  |
| 34763 | 1450461_at     | 21414  | Tcf7          | NM_009331          | -2.46285 | 0.0223907   |
| 6383  | 1422070_at     | 26876  | Adh4          | NM_011996          | -2.47068 | 0.00865132  |
| 19177 | 1434864_at     | 233280 | Nipa1         | NM_153578          | -2.52522 | 0.014739    |
| 27178 | 1442865_at     | 331374 | Dgkk          | NM_177914          | -2.53399 | 0.0212121   |
| 5520  | 1421207_at     | 16878  | Lif           | 1537 /// NM_008501 | -2.59953 | 0.0362275   |
| 28667 | 1444354_at --- | ---    | ---           | ---                | -2.60116 | 0.00695797  |
| 7870  | 1423557_at     | 15980  | Ifngr2        | NM_008338          | -2.63462 | 0.0265793   |
| 4701  | 1420388_at     | 19142  | Prss12        | NM_008939          | -2.65548 | 0.0445922   |
| 34195 | 1449893_a_at   | 16206  | Lrig1         | NM_008377          | -2.69861 | 9.33E-05    |
| 25688 | 1441375_at --- | ---    | ---           | ---                | -2.74245 | 0.0216012   |
| 35922 | 1451620_at     | 227580 | C1ql3         | NM_153155          | -2.80168 | 0.0013026   |
| 968   | 1416630_at     | 15903  | Id3           | NM_008321          | -2.8975  | 0.00225906  |
| 27301 | 1442988_at --- | ---    | ---           | ---                | -2.96426 | 0.000185846 |
| 18523 | 1434210_s_at   | 16206  | Lrig1         | NM_008377          | -2.97805 | 0.000895753 |
| 37305 | 1453003_at     | 20660  | Sorl1         | NM_011436          | -2.98772 | 0.0026309   |
| 20023 | 1435710_at     | 106930 | Al661384      | ---                | -3.06384 | 0.00585576  |
| 42075 | 1457773_at     | 30925  | Slamf6        | NM_030710          | -3.11872 | 0.00462683  |
| 23660 | 1439347_at     | 217169 | Tns4          | NM_172564          | -3.16225 | 0.0082923   |
| 18252 | 1433939_at     | 16764  | Aff3          | NM_010678          | -3.27639 | 0.00110764  |
| 34292 | 1449990_at     | 16183  | Il2           | NM_008366          | -3.34342 | 0.00957408  |
| 5350  | 1421037_at     | 18143  | Npas2         | NM_008719          | -3.38401 | 0.000110566 |
| 18914 | 1434601_at     | 105827 | Amigo2        | 1602 /// NM_178114 | -3.40748 | 0.0216703   |

|       |              |        |               |          |           |          |             |
|-------|--------------|--------|---------------|----------|-----------|----------|-------------|
| 38968 | 1454666_at   | 16599  | Klf3          |          | NM_008453 | -3.56289 | 0.0302083   |
| 9399  | 1425086_a_at | 30925  | Slamf6        |          | NM_030710 | -3.65601 | 0.00741975  |
| 3380  | 1419042_at   | 60440  | ligp1         | i275 /// | NM_021792 | -3.72453 | 0.000475718 |
| 15094 | 1430781_at   | 78801  | Ak7           |          | NM_030187 | -3.77599 | 0.00520438  |
| 563   | 1416225_at   | 11522  | Adh1          |          | NM_007409 | -3.83167 | 0.00552989  |
| 18402 | 1434089_at   | 104027 | Synpo         | i975 /// | NM_177340 | -3.852   | 0.0026371   |
| 28567 | 1444254_at   | 217169 | Tns4          |          | NM_172564 | -3.87618 | 0.0229631   |
| 40728 | 1456426_at   | 93675  | Clec2i        |          | NM_020257 | -3.88005 | 0.0217866   |
| 24144 | 1439831_at   | ---    | ---           |          | ---       | -4.04064 | 0.000512896 |
| 37697 | 1453395_at   | 76675  | 5330403D14Rik |          | ---       | -4.07563 | 0.00675003  |
| 38143 | 1453841_at   | 72389  | 2310050P20Rik |          | ---       | -4.11741 | 0.00257211  |
| 4972  | 1420659_at   | 30925  | Slamf6        |          | NM_030710 | -4.26062 | 0.00655449  |
| 3381  | 1419043_a_at | 60440  | ligp1         | i275 /// | NM_021792 | -4.36356 | 1.68E-05    |
| 25485 | 1441172_at   | ---    | ---           |          | ---       | -4.57195 | 0.00169075  |
| 21719 | 1437406_x_at | 16010  | lgfbp4        |          | NM_010517 | -4.96421 | 0.00464219  |
| 6305  | 1421992_a_at | 16010  | lgfbp4        |          | NM_010517 | -5.11334 | 0.00630696  |
| 17784 | 1433471_at   | 21414  | Tcf7          |          | NM_009331 | -5.85361 | 0.00240462  |
| 8070  | 1423757_x_at | 16010  | lgfbp4        |          | NM_010517 | -6.0769  | 0.000742631 |
| 21718 | 1437405_a_at | 16010  | lgfbp4        |          | NM_010517 | -7.00762 | 0.00100724  |
| 8069  | 1423756_s_at | 16010  | lgfbp4        |          | NM_010517 | -7.95647 | 0.00115341  |
