# Supplementary material
Source: PubMed Central journal article supplement (PMC6002241)
Supplement: IMM-154-418-s006.pdf [file IMM-154-418-s006.pdf]

**Table S2: Oligonucleotide primers used for quantitative real-time PCR analysis**

| <b>mRNA</b> | <b>Forward 5'-3'</b>                                 | <b>Reverse 5'-3'</b>      |
|-------------|------------------------------------------------------|---------------------------|
| Ccl9        | CTGGGCCAGATCACACATGCA                                | CCGGCCTGGTACACCCACCAC     |
| Csf2        | CCTTCAAGAAGCTAACATGTGTGC                             | GGCTGTCTATGAAATCCGCATA    |
| Havcr2      | GGTCTTACCCTCAACTGTGTCCTG                             | GGAGTGACCTTGGCTGCTTTGAT   |
| Hprt        | GACATAAAAGTTATTGGTGGAGAT                             | TGCATTGTTTTACCAGTGTCAAT   |
| Id2         | ATCAGCATCCTGTCCTTGCAGG                               | TGTTCTCCTGGTGAATGGCTG     |
| Id3         | CCCGTCGACCGAGGAGCCTCTT                               | GGAGTGAGCTCAGCTGTCTGGATCG |
| Ifng        | ATGAACGCTACACACTGCATC                                | CCATCCTTTTGCCAGTTCCTC     |
| Ifngr2      | CGGGGCAACTTTTCAGTATCTT                               | CCTGGCGGAGGCATTTGC        |
| Il2         | Purchased from realtimeprimers.com (Elkins Park, PA) |                           |
| Il10        | AGGACTTTAAGGGTACTTGGG                                | TCSTTCATGGCCTTGTAGACACC   |
| Prdm1       | ACAGCAAAGAGGTTATTGGCGT                               | GGATTCACGTAGCGCATCCA      |
| Prf1        | GCCAGCGTCTCCAGTGAATACA                               | GCTTCGGGTTCTGTTCTTCCAGT   |
| Slamf6      | CCACCCTGGAATGCAGTATGGT                               | CGGCCTCTCTGGAATGATTAATA   |
| Tbx21       | GCCAGGGAACCGCTTATATGTC                               | CTGTGAGATCATATCCTTGGGCTG  |
| Tcf7        | CCAGAAGCAAGGAGTTCACAGG                               | TCAAGGATGGGTGGGTGAAC      |
